# Supplementary material for: RETRACTED ARTICLE: Downregulation of lncRNA ZNF582-AS1 due to DNA hypermethylation promotes clear cell renal cell carcinoma growth and metastasis by regulating the N(6)-methyladenosine modification of MT-RNR1
Source: Springer Nature journal article supplement (doi:10.1186/s13046-021-01889-8), 2021-03-10
Supplement: MOESM1 [file 18951600]

**Table S1:** The detailed primers information of qRT-PCR, MSP, Sequenom MassARRAY quantitative methylation analysis and MeRIP-qRT-PCR

| Gene                      | Primer  | Sequence (5'-3')           | Nt | Tm    | Length of amplicon | GC%   |
|---------------------------|---------|----------------------------|----|-------|--------------------|-------|
| <b>qRT-PCR</b>            |         |                            |    |       |                    |       |
| ZNF582-AS1                | Forward | GTTCGTGTGTTTCGAGTCCCT      | 20 | 59.97 | 167                | 55.00 |
|                           | Reverse | CGGAGTCAGAAGCTACCACC       | 20 | 59.83 |                    | 60.00 |
| MT-RNR1                   | Forward | CCTCACCACCTCTTGCTCAG       | 20 | 60.04 | 86                 | 60.00 |
|                           | Reverse | TTACGTGGGTACTTGCGCTT       | 20 | 59.97 |                    | 50.00 |
| MT-RNR2                   | Forward | GCAGCCGCTATTAAGGTTTCG      | 21 | 60.00 | 167                | 52.38 |
|                           | Reverse | TATCATTTACGGGGGAAGGCG      | 21 | 59.93 |                    | 52.38 |
| RNA28SN5                  | Forward | GTGAGCCTTGAAGCCTAGGG       | 20 | 60.11 | 115                | 60.00 |
|                           | Reverse | GGAACCCTTCTCCACTTCGG       | 20 | 60.04 |                    | 60.00 |
| U1 snRNA                  | Forward | GGGAGATACCATGATCACGAAGGT   | 24 | 61.78 | 118                | 50.00 |
|                           | Reverse | CCACAAATTATGCAGTCGAGTTTCCC | 26 | 62.75 |                    | 46.15 |
| GAPDH                     | Forward | GAAAGCCTGCCGGTGAATAA       | 20 | 60.32 | 113                | 55.00 |
|                           | Reverse | GCATCACCCGGAGGAGAAAT       | 20 | 59.82 |                    | 55.00 |
| <b>MSP</b>                |         |                            |    |       |                    |       |
| ZNF582-AS1                |         |                            |    |       |                    |       |
| M Pair                    | MF      | TAGTCGGAAGATGGCGTAGAC      | 21 | 59.05 | 95                 | 52.38 |
|                           | MR      | GCCTAAAACTATATTTCCCGA      | 22 | 53.98 |                    | 36.36 |
| U Pair                    | UF      | GTAGTTGGAAGATGGTGTAGATGT   | 24 | 58.02 | 96                 | 41.67 |
|                           | UR      | ACCTAAAACTATATTTCCCAAAA    | 24 | 52.54 |                    | 25.00 |
| GAPDH                     | Forward | GAAAGCCTGCCGGTGAATAA       | 20 | 60.32 | 113                | 55.00 |
|                           | Reverse | GCATCACCCGGAGGAGAAAT       | 20 | 59.82 |                    | 55.00 |
| <b>Sequenom MassARRAY</b> |         |                            |    |       |                    |       |
| ZNF582-AS1                | Forward | GGGTATTAGTTTTTGTGGATTTTAGA | 27 | 59.26 | 394                | 30.00 |
|                           | Reverse | AATAACACACCCAACACCACAA     | 22 | 60.05 |                    | 41.00 |
| <b>MeRIP-qRT-PCR</b>      |         |                            |    |       |                    |       |
| EEF1A1 Positive           | Forward | CGGTCTCAGAACTGTTTGTTC      | 22 | 57.80 | 124                | 45.45 |
|                           | Reverse | AAACCAAAGTGGTCCACAAA       | 20 | 55.88 |                    | 40.00 |
| EEF1A1 Negative           | Forward | GGATGGAAAGTCACCCGTAAG      | 21 | 58.37 | 95                 | 52.38 |
|                           | Reverse | TTGTCAGTTGGACGAGTTGG       | 20 | 58.05 |                    | 50.00 |
| MT-RNR1                   | Forward | ACTGCTCGCCAGAACACTAC       | 20 | 60.04 | 113                | 55.00 |
|                           | Reverse | GGTGAGGTTGATCGGGGTTT       | 20 | 59.69 |                    | 55.00 |
