# Supplementary material for: RETRACTED ARTICLE: Downregulation of lncRNA ZNF582-AS1 due to DNA hypermethylation promotes clear cell renal cell carcinoma growth and metastasis by regulating the N(6)-methyladenosine modification of MT-RNR1
Source: Springer Nature journal article supplement (doi:10.1186/s13046-021-01889-8), 2021-03-10
Supplement: MOESM5 [file 18951600]

(1) >tr|A8K0B9|A8K0B9\_HUMAN rRNA adenine N(6)-methyltransferase OS=Homo sapiens OX=9606 PE=2 SV=1↵

MAASGKLSTCHLPPLPTIREIIKLLRLQAAKQLSQNFLDLRLTDKIVRKAGNL  
TNAVYVEVGPGGITRSILNADVAELLVVEKDTRFIPGLQMLSDAAPGKLRI  
VHGDVLTFKVEKAFSESLKRPWEDDPPNVHIIGKLPFSVSTPLIKWLENISCR  
DGPVYGRQTMTLTFQKEVAERLAANTGSKQRSRLSVMAQYLCNVRHIFTIP  
GQAFVPKPEVDVGVVHFTPLIQPKIEQPFLVEKVVQNVFQFRRKYCHRGLR  
MLFPEAQRLESTGRLLLELADIDPTLRPRQLSISHFKSLCDVYRKMCDPQLF  
AYNFREELKRRKSKNEEKEEDDAENYRL↵

↵

(2) >sp|Q8WVM0|TFB1M\_HUMAN Dimethyladenosine transferase 1, mitochondrial  
OS=Homo sapiens OX=9606 GN=TFB1M PE=1 SV=1↵

MAASGKLSTCRLPPLPTIREIIKLLRLQAAKQLSQNFLDLRLTDKIVRKAGNL  
TNAVYVEVGPGGITRSILNADVAELLVVEKDTRFIPGLQMLSDAAPGKLRI  
VHGDVLTFKVEKAFSESLKRPWEDDPPNVHIIGNLPFSVSTPLIKWLENISCR  
DGPVYGRQTMTLTFQKEVAERLAANTGSKQRSRLSVMAQYLCNVRHIFTIP  
GQAFVPKPEVDVGVVHFTPLIQPKIEQPFLVEKVVQNVFQFRRKYCHRGLR  
MLFPEAQRLESTGRLLLELADIDPTLRPRQLSISHFKSLCDVYRKMCDPQL↵
