# Supplementary material for: RETRACTED ARTICLE: Downregulation of lncRNA ZNF582-AS1 due to DNA hypermethylation promotes clear cell renal cell carcinoma growth and metastasis by regulating the N(6)-methyladenosine modification of MT-RNR1
Source: Springer Nature journal article supplement (doi:10.1186/s13046-021-01889-8), 2021-03-10
Supplement: MOESM6 [file 18951600]

| ^ # | ↕ Protein region | ↕ RNA region | ↕ Interaction Propensity | ↕ Discriminative Power | ↕ Normalized Score |
|-----|------------------|--------------|--------------------------|------------------------|--------------------|
| 1   | 71-122           | 104-171      | 20.50                    | 54                     | 3.33               |
| 2   | 71-122           | 34-101       | 20.43                    | 54                     | 3.32               |
| 3   | 226-277          | 104-171      | 19.71                    | 52                     | 3.21               |
| 4   | 71-122           | 100-167      | 19.31                    | 52                     | 3.14               |
| 5   | 226-277          | 34-101       | 19.00                    | 50                     | 3.09               |
| 6   | 226-277          | 100-167      | 18.83                    | 50                     | 3.07               |
| 7   | 76-127           | 34-101       | 18.05                    | 50                     | 2.94               |
| 8   | 76-127           | 104-171      | 17.86                    | 47                     | 2.91               |
| 9   | 226-277          | 595-662      | 17.66                    | 47                     | 2.88               |
| 10  | 71-122           | 595-662      | 17.59                    | 47                     | 2.87               |
| 11  | 71-122           | 38-105       | 17.35                    | 47                     | 2.83               |
| 12  | 76-127           | 100-167      | 16.60                    | 45                     | 2.71               |
| 13  | 226-277          | 38-105       | 16.24                    | 45                     | 2.66               |
| 14  | 26-77            | 104-171      | 16.20                    | 45                     | 2.65               |
| 15  | 71-122           | 133-200      | 16.07                    | 45                     | 2.63               |
| 16  | 221-272          | 104-171      | 15.86                    | 42                     | 2.59               |
| 17  | 101-152          | 104-171      | 15.77                    | 42                     | 2.58               |
| 18  | 26-77            | 34-101       | 15.76                    | 42                     | 2.58               |
| 19  | 71-122           | 71-138       | 15.60                    | 42                     | 2.55               |
| 20  | 26-77            | 100-167      | 15.45                    | 42                     | 2.53               |
