# Supplementary figures and images for: RETRACTED ARTICLE: Downregulation of lncRNA ZNF582-AS1 due to DNA hypermethylation promotes clear cell renal cell carcinoma growth and metastasis by regulating the N(6)-methyladenosine modification of MT-RNR1
Source: Springer Nature journal article supplement (doi:10.1186/s13046-021-01889-8), 2021-03-10

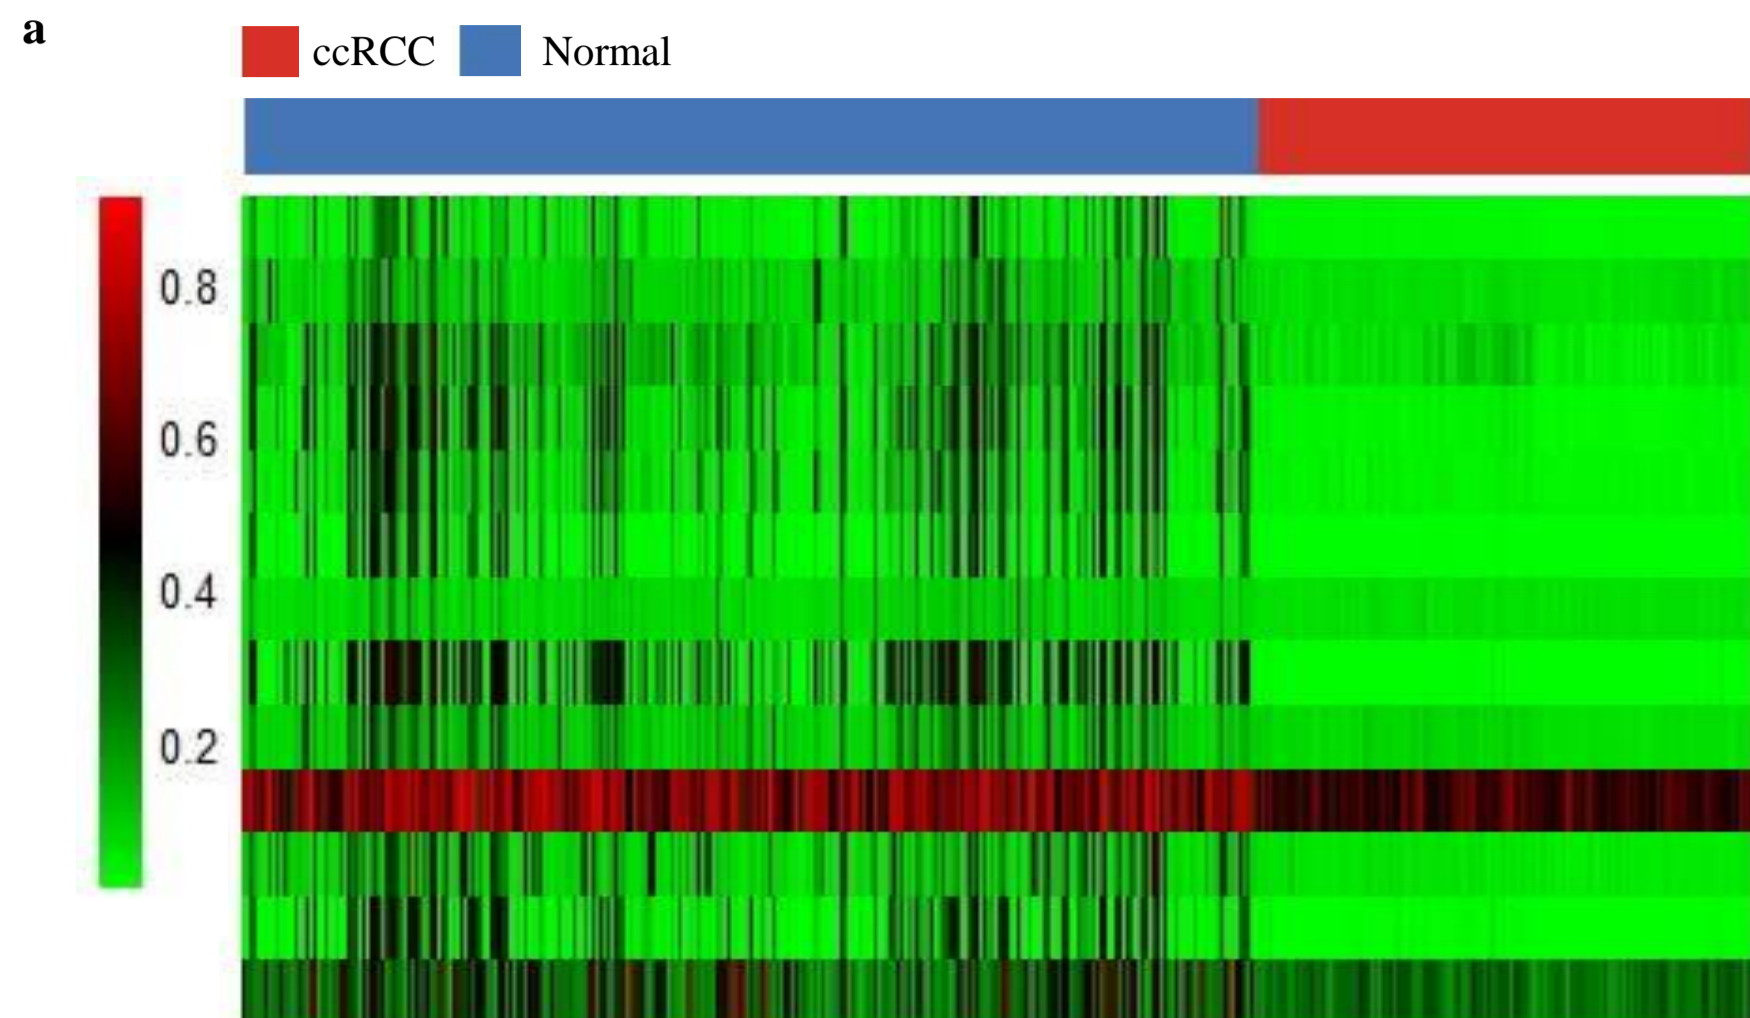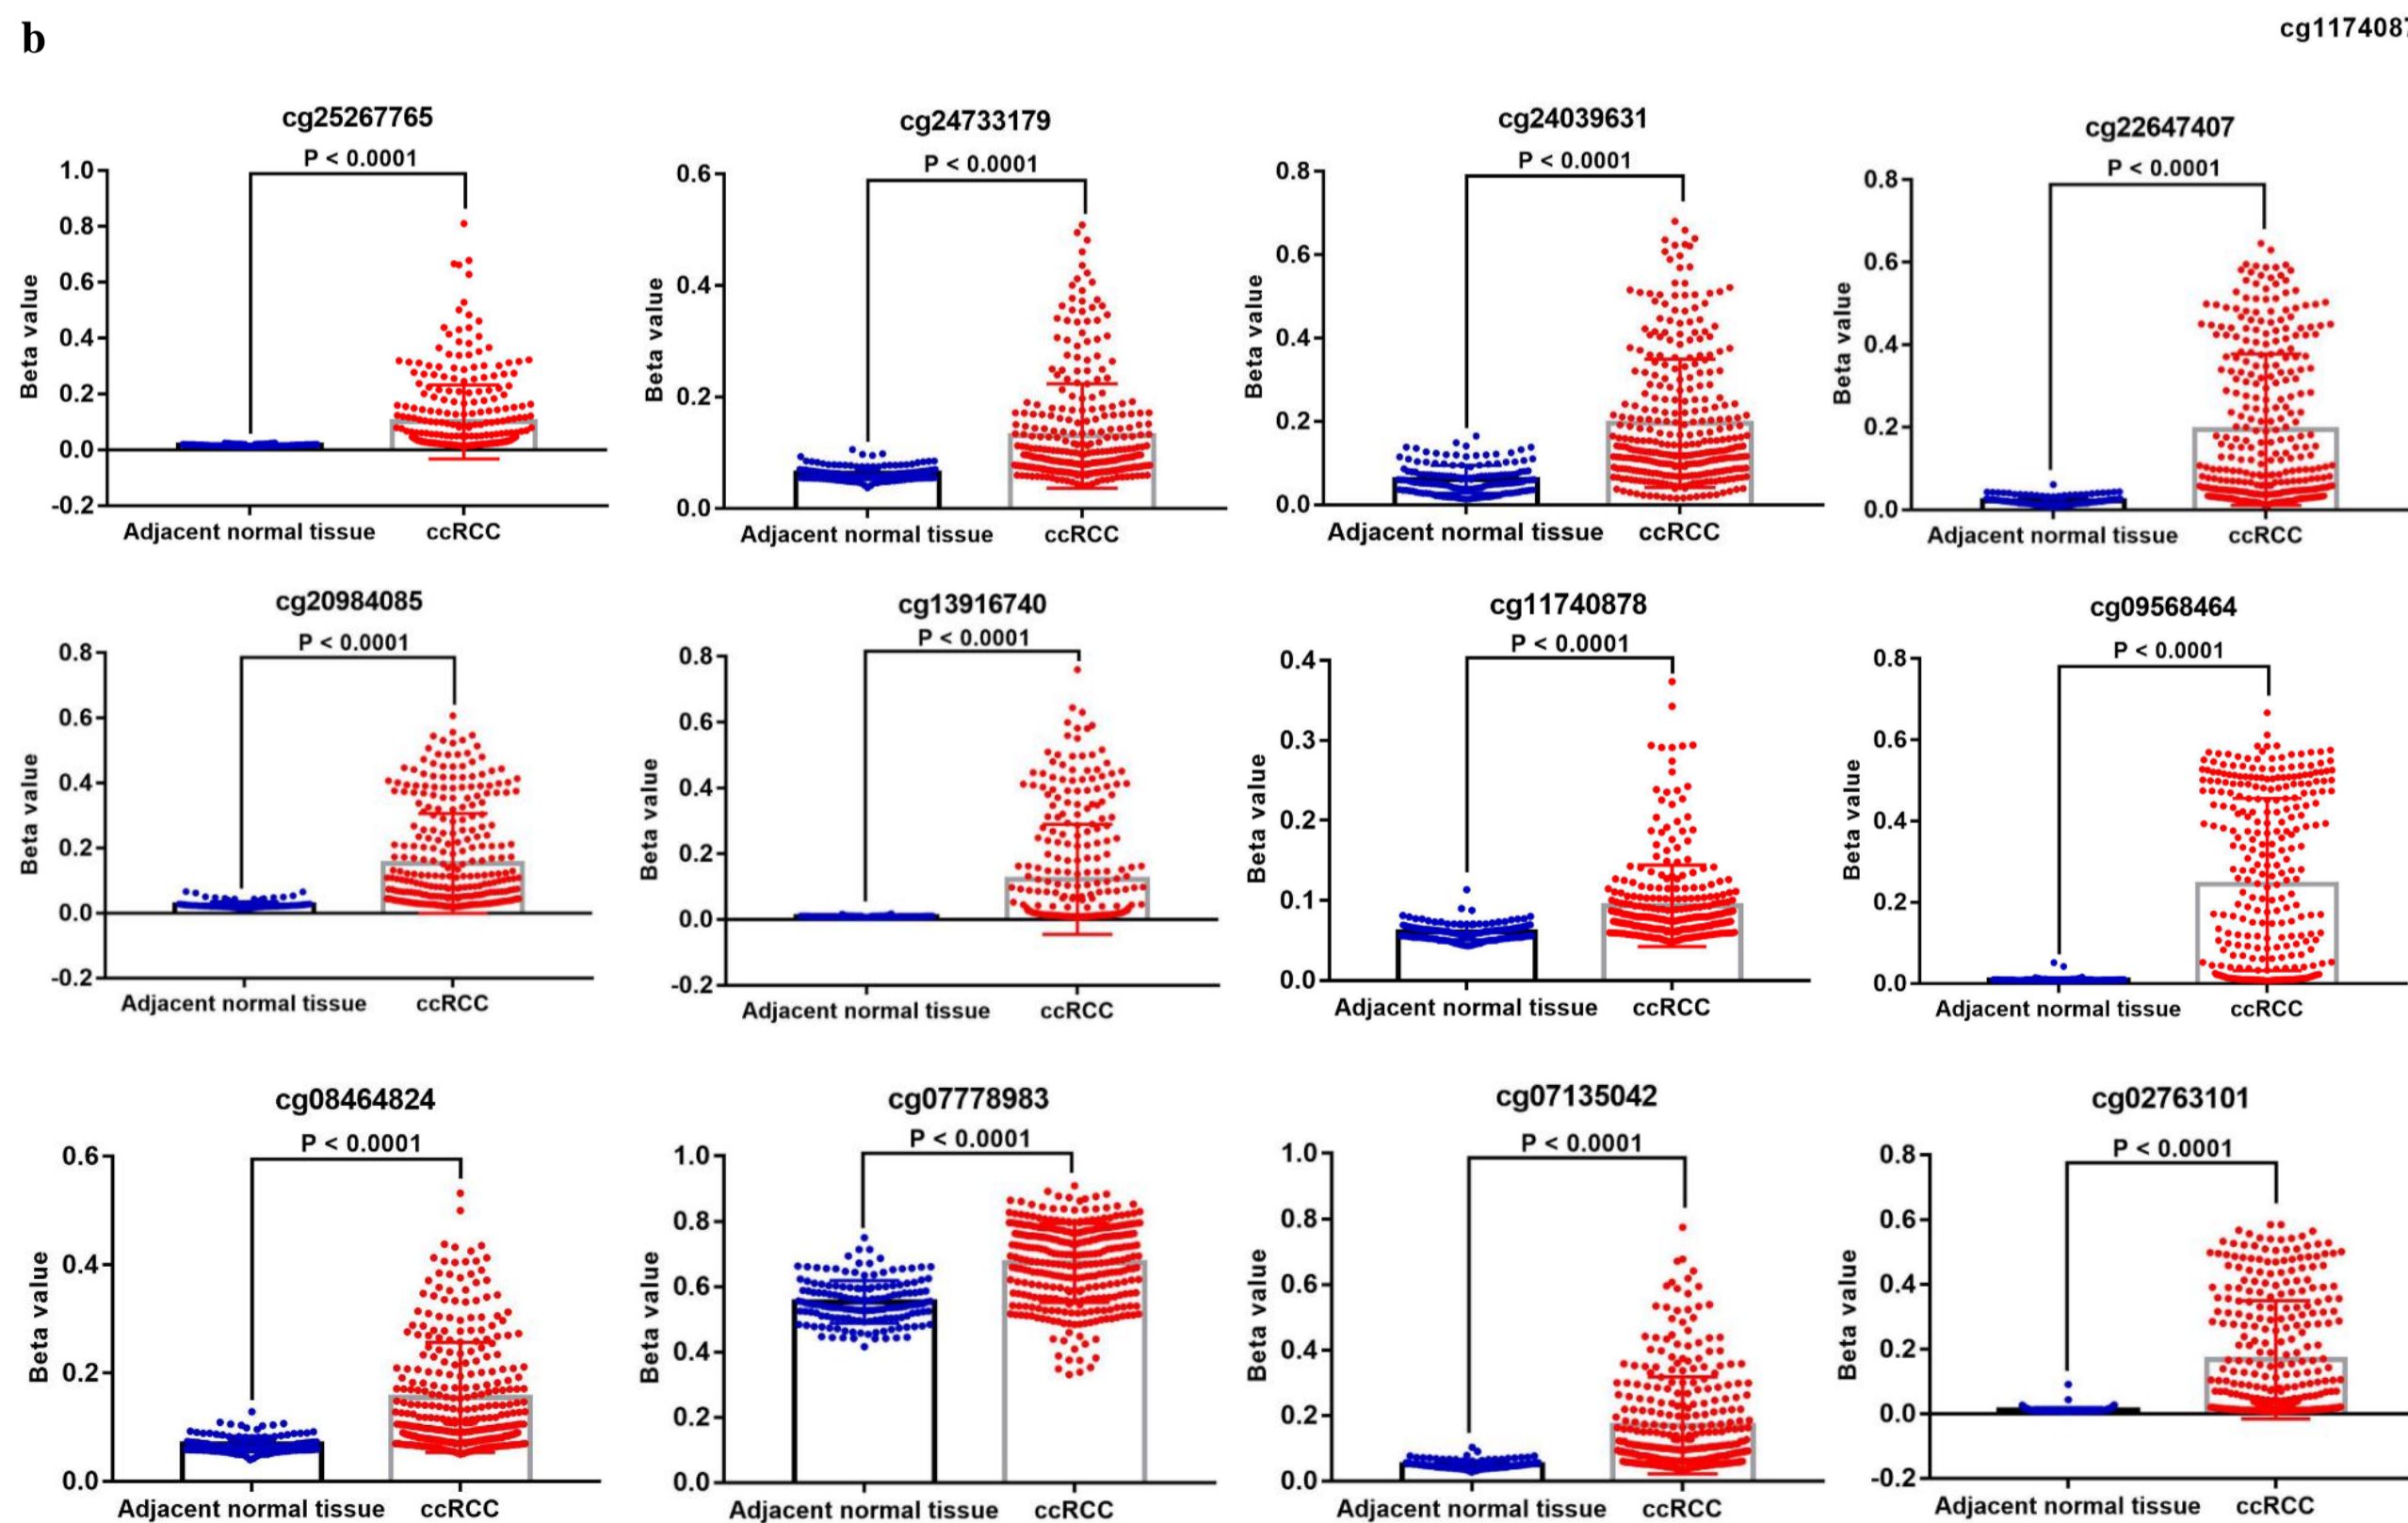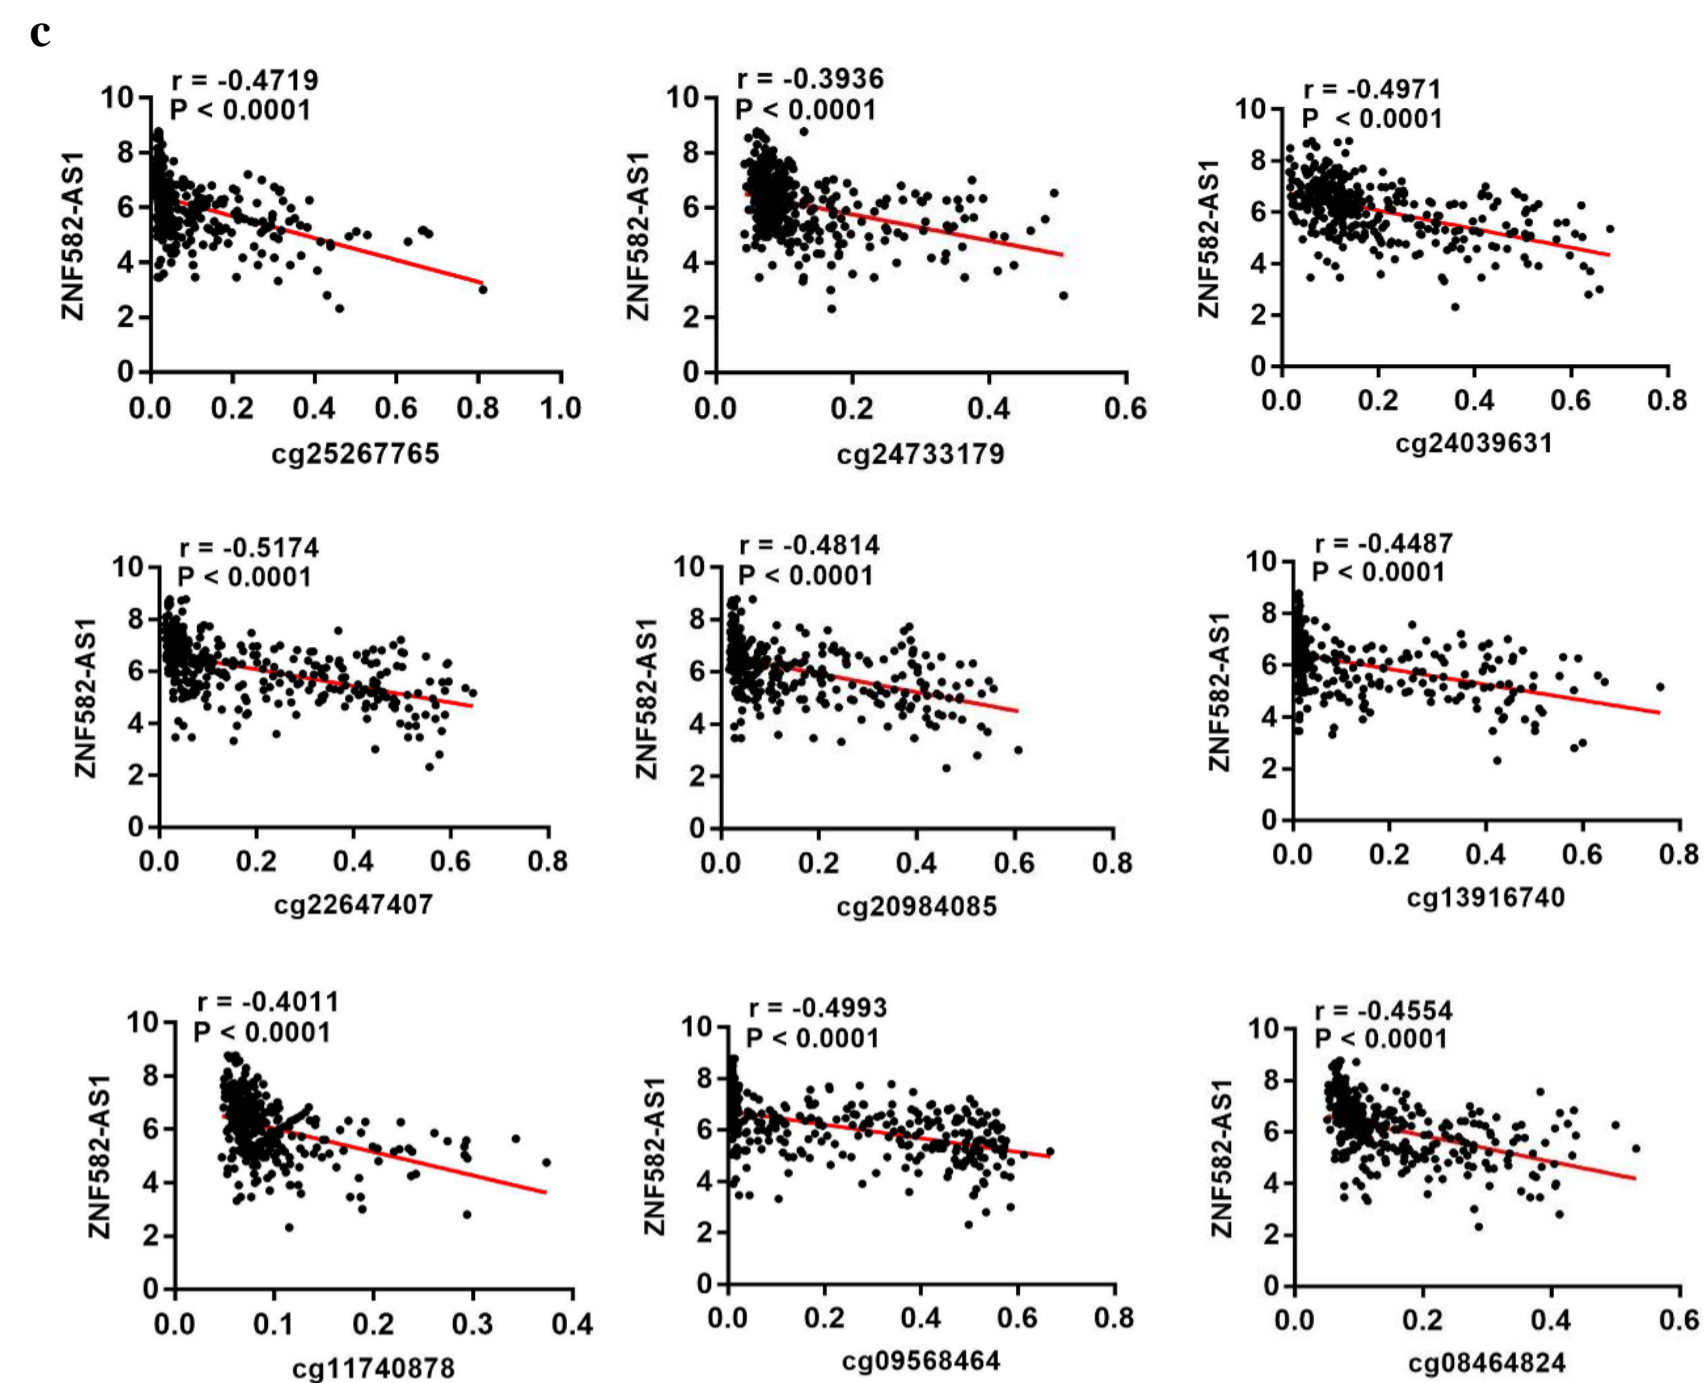

Supplement: MOESM2 [file 18951600]

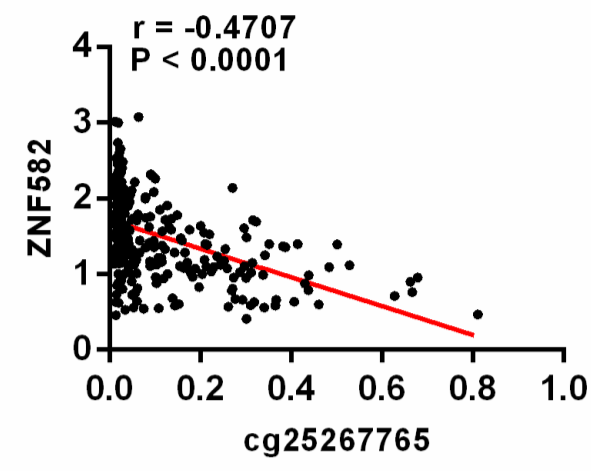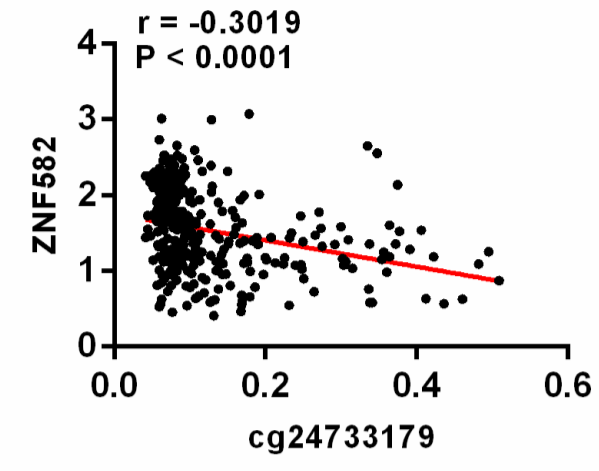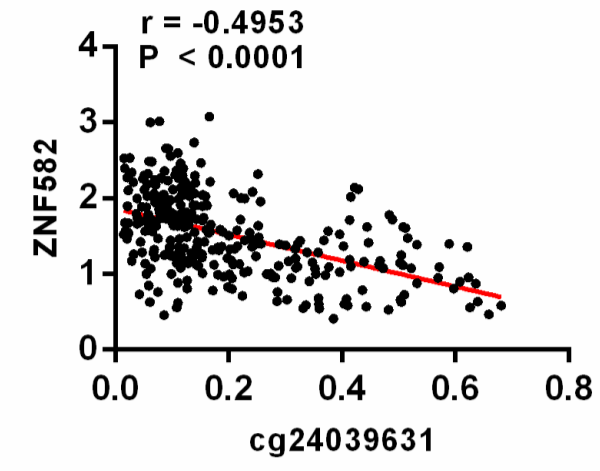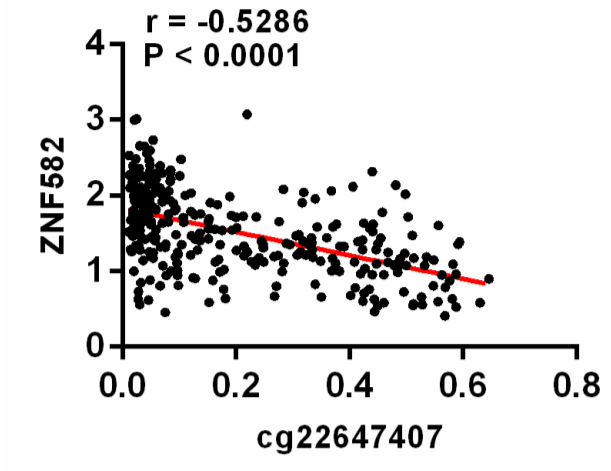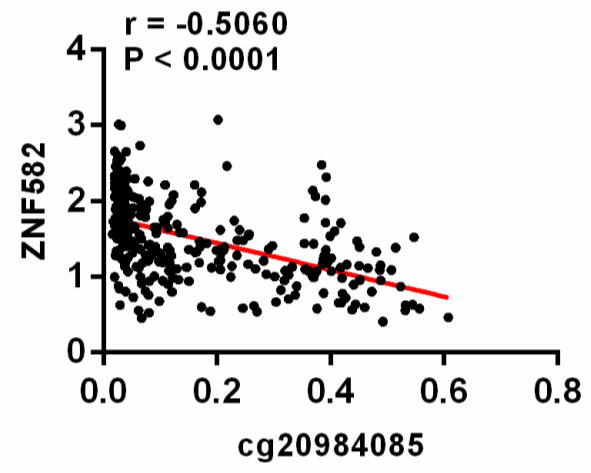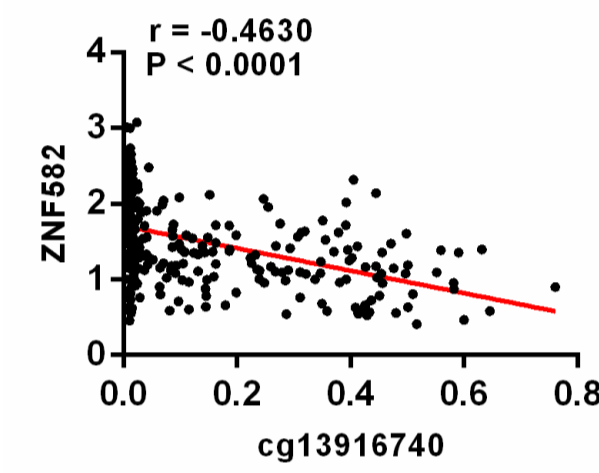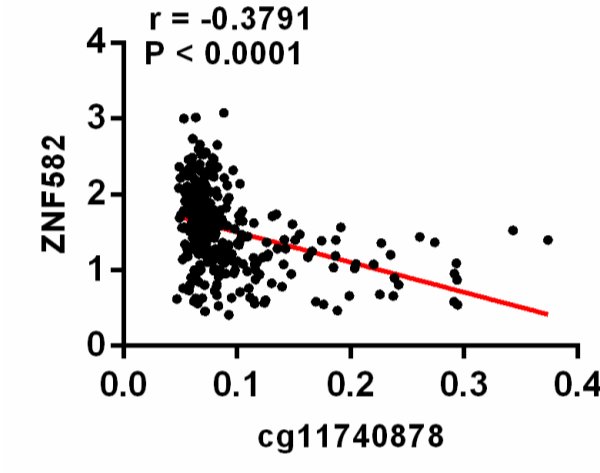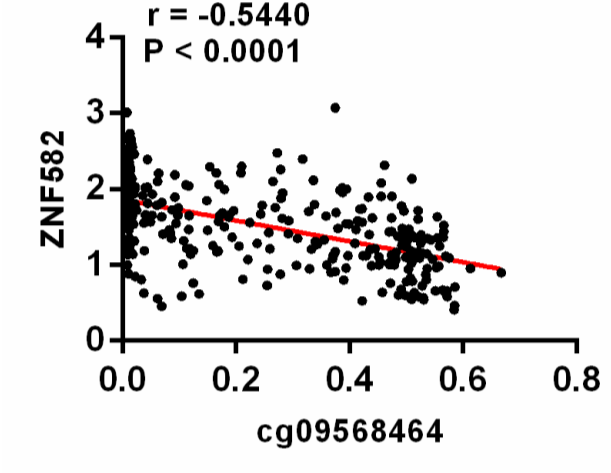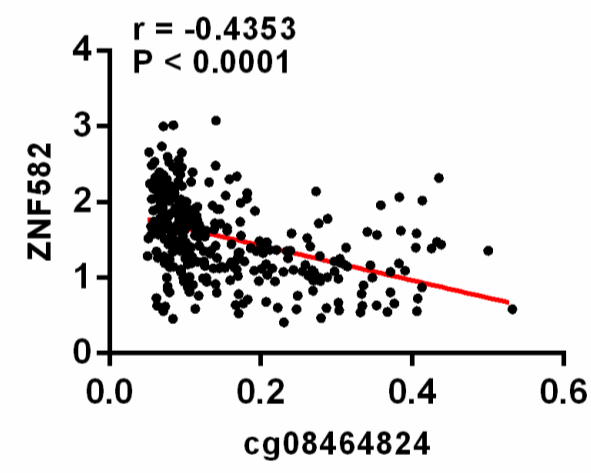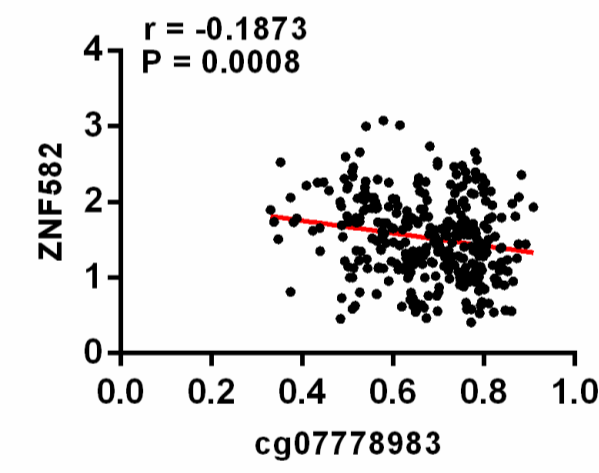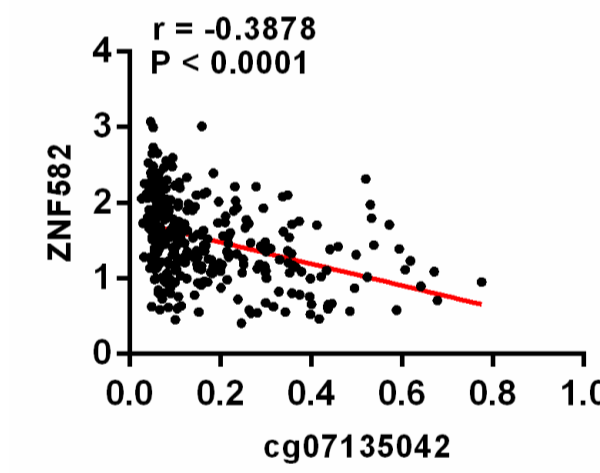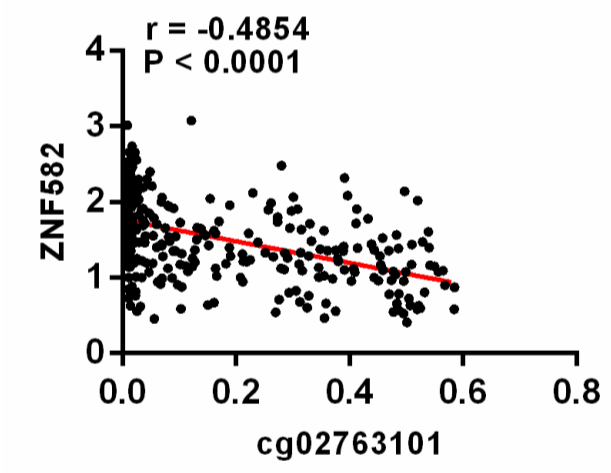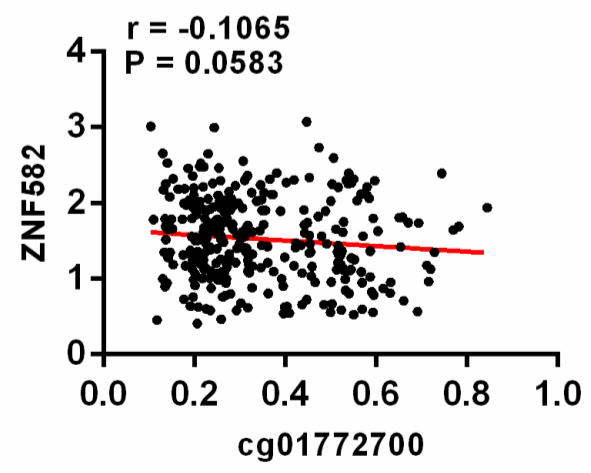

Supplement: MOESM3 [file 18951600]

**a**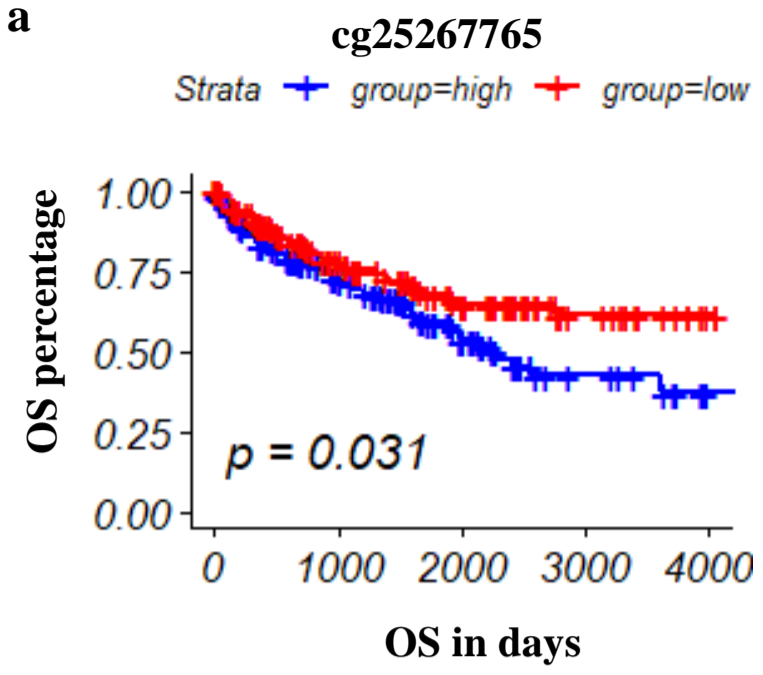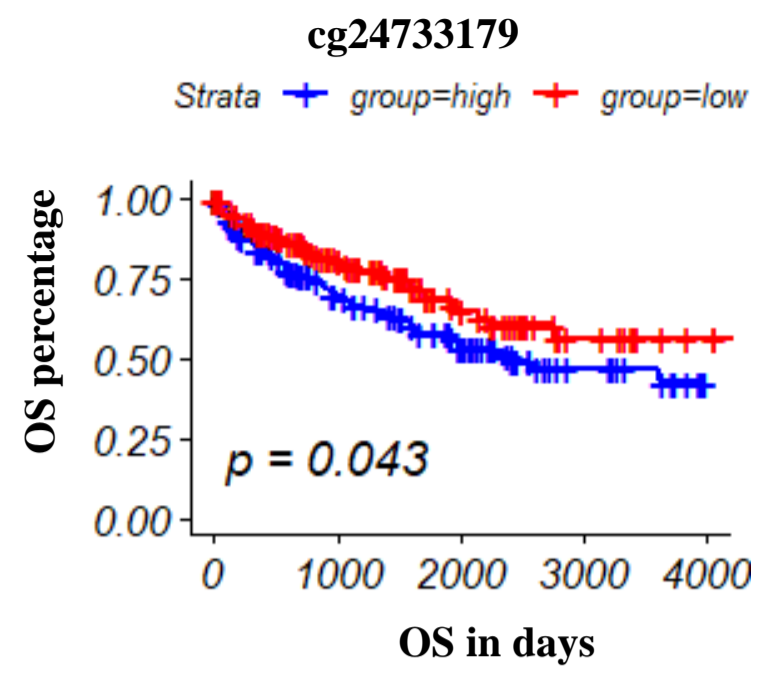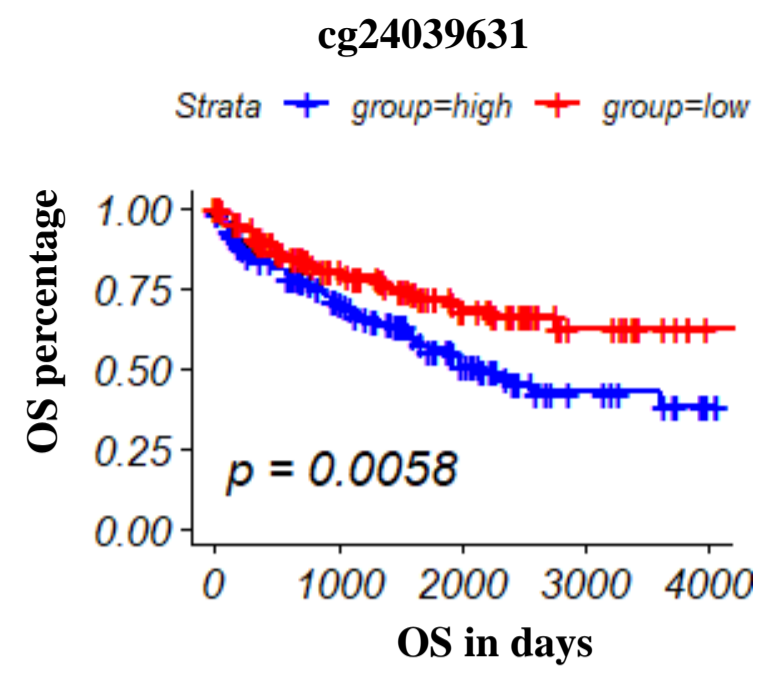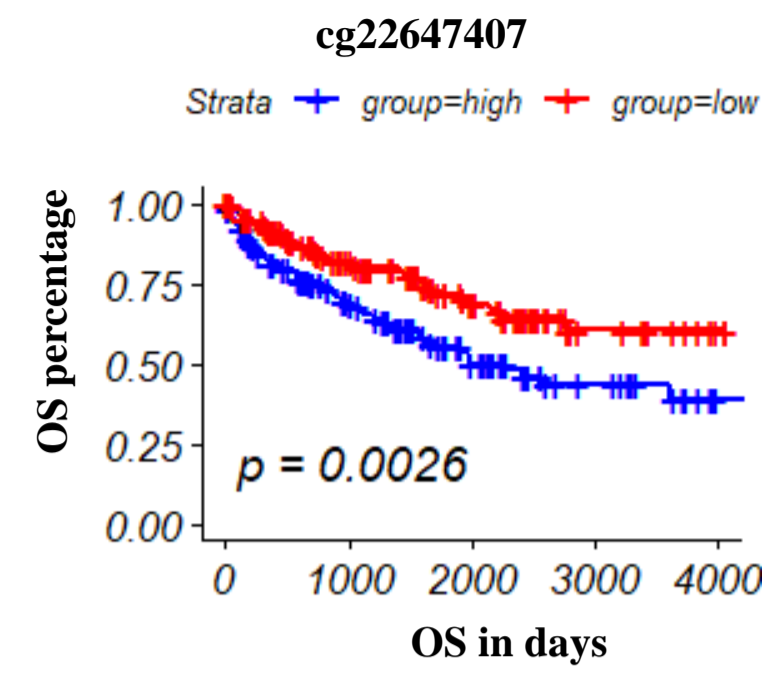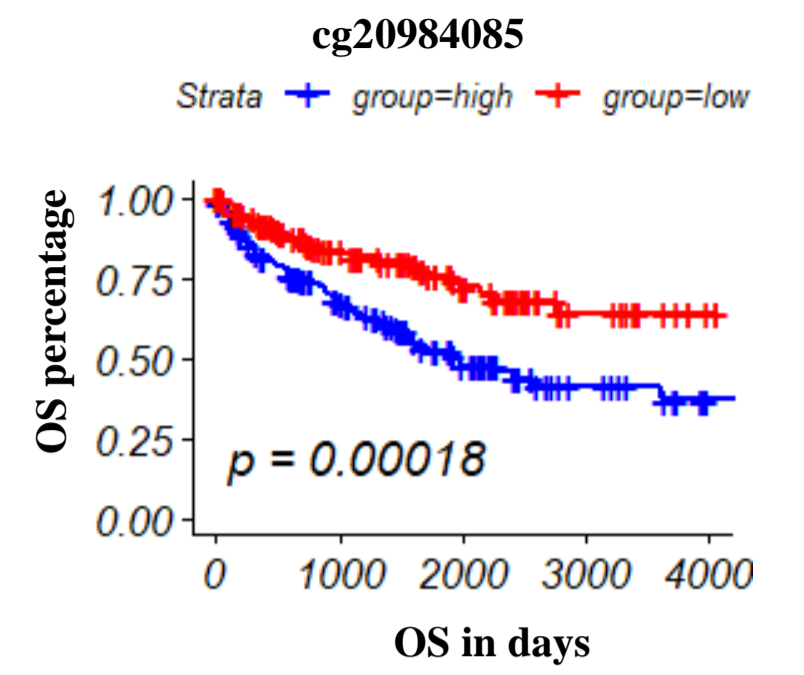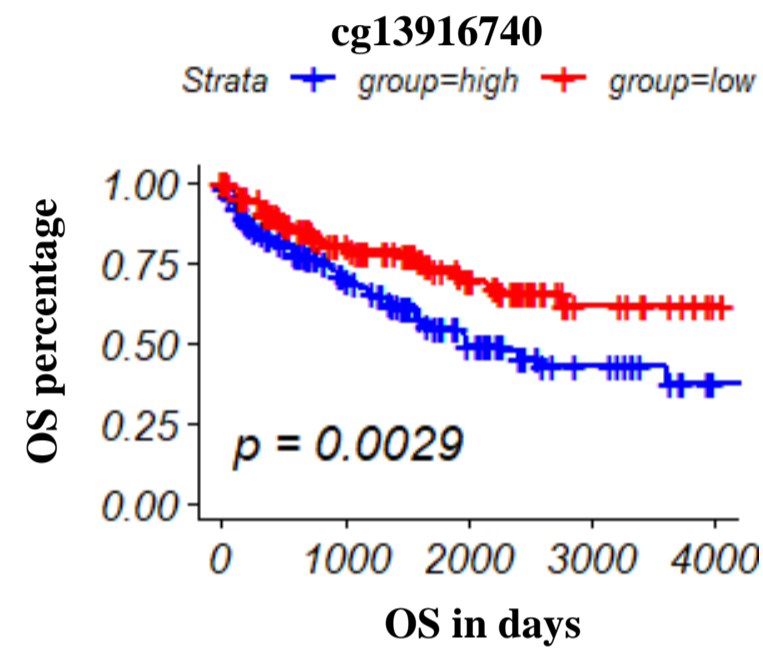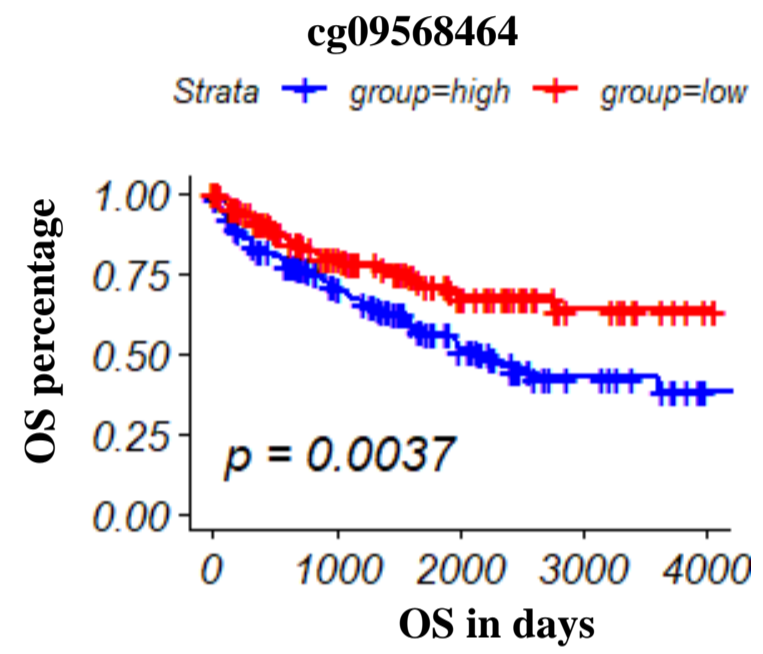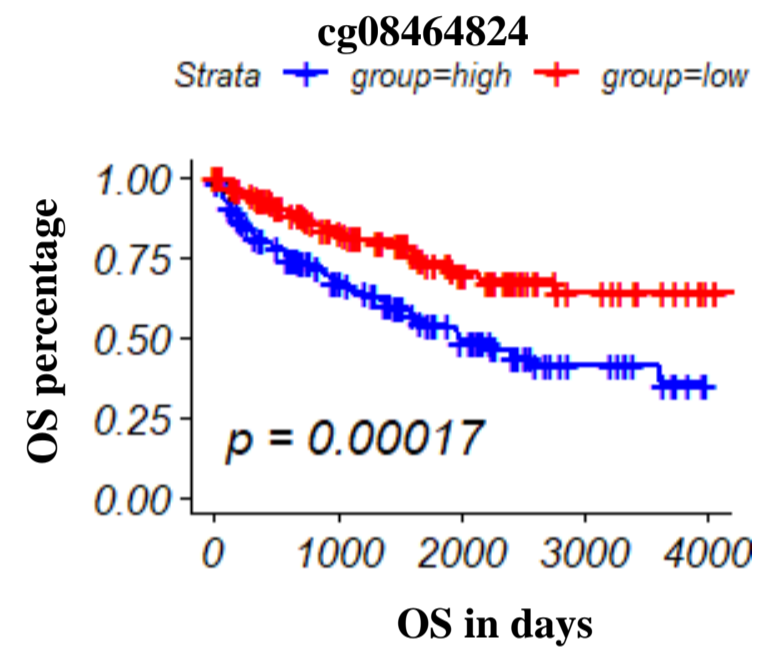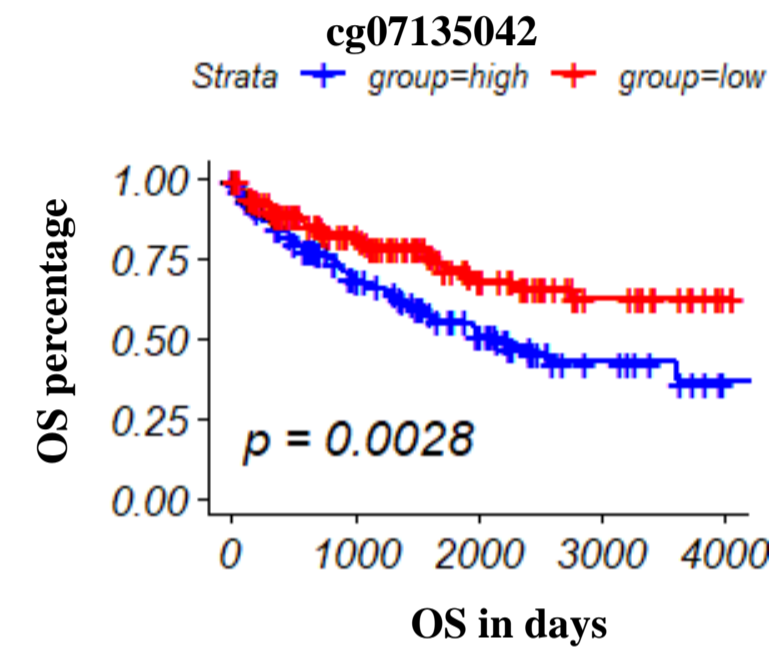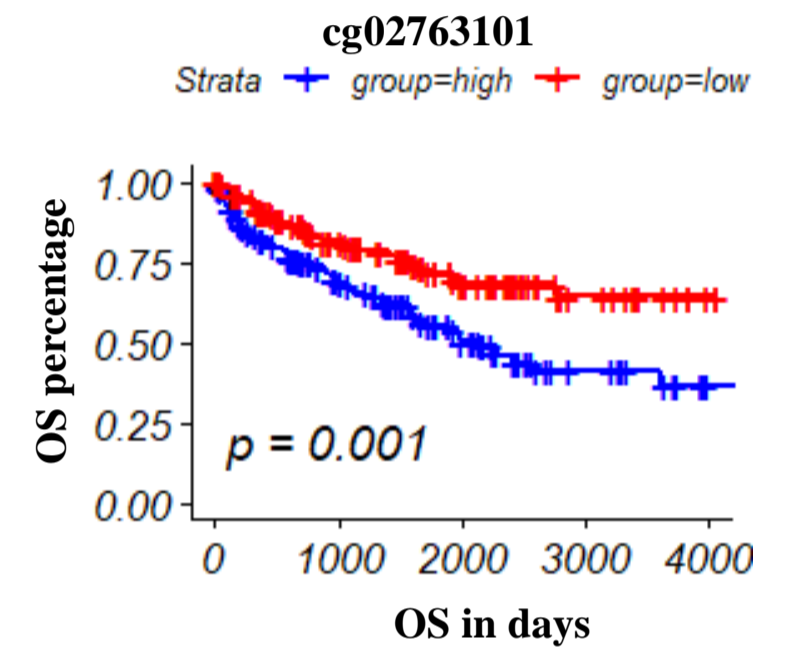**b**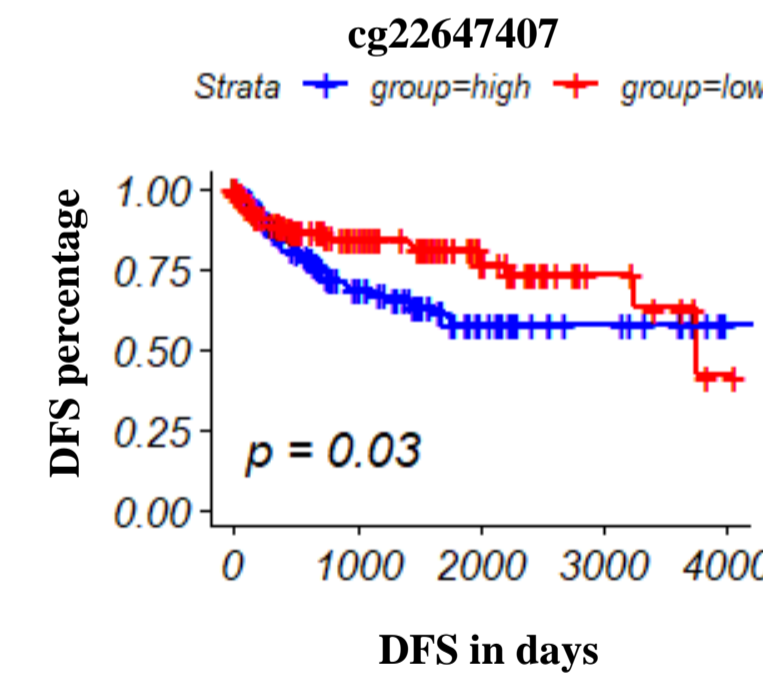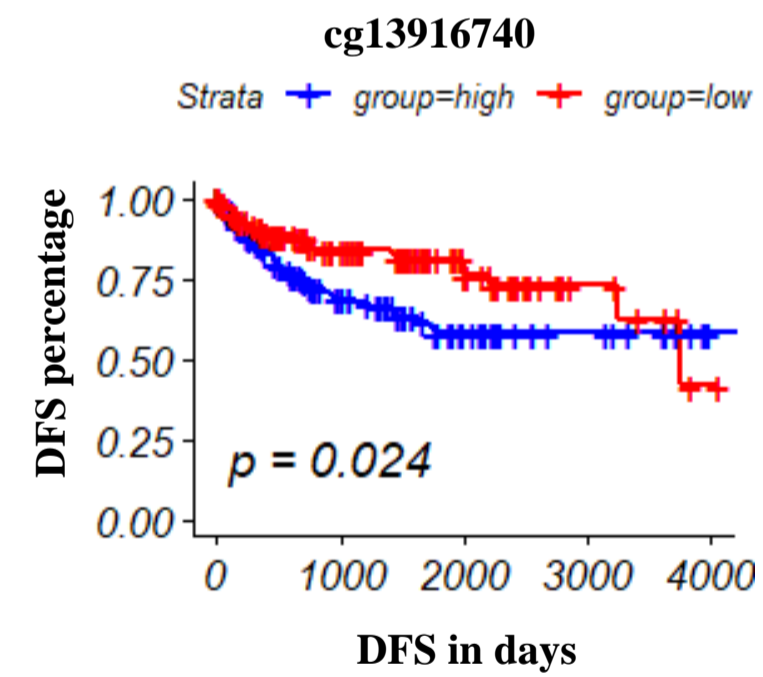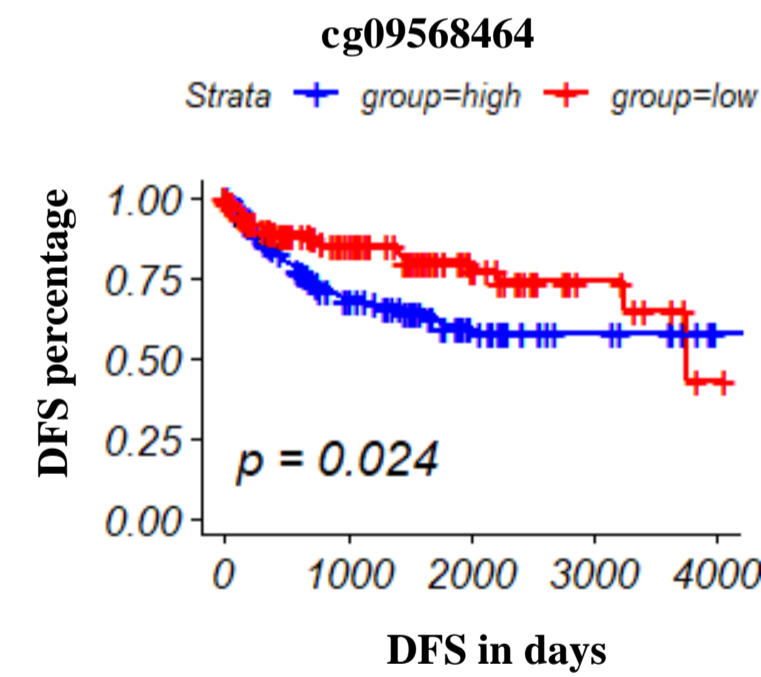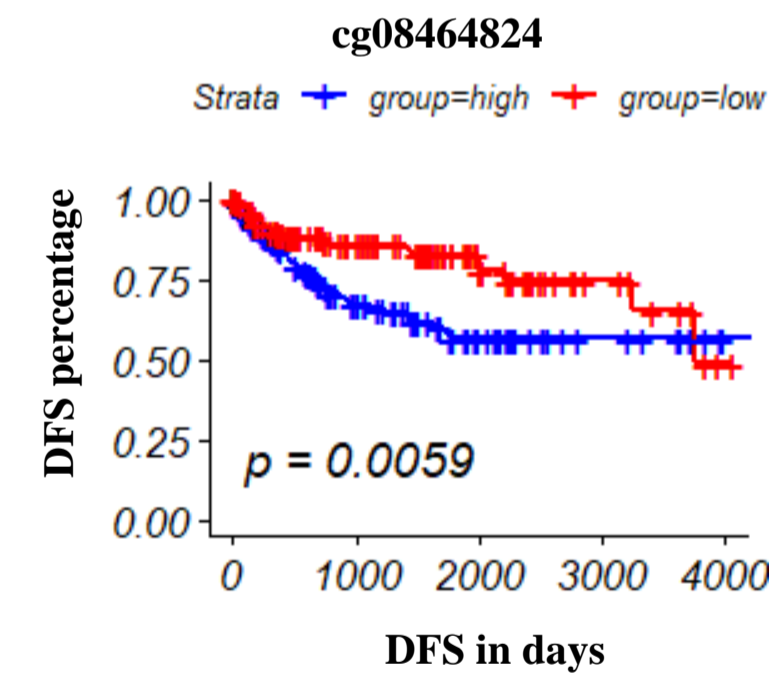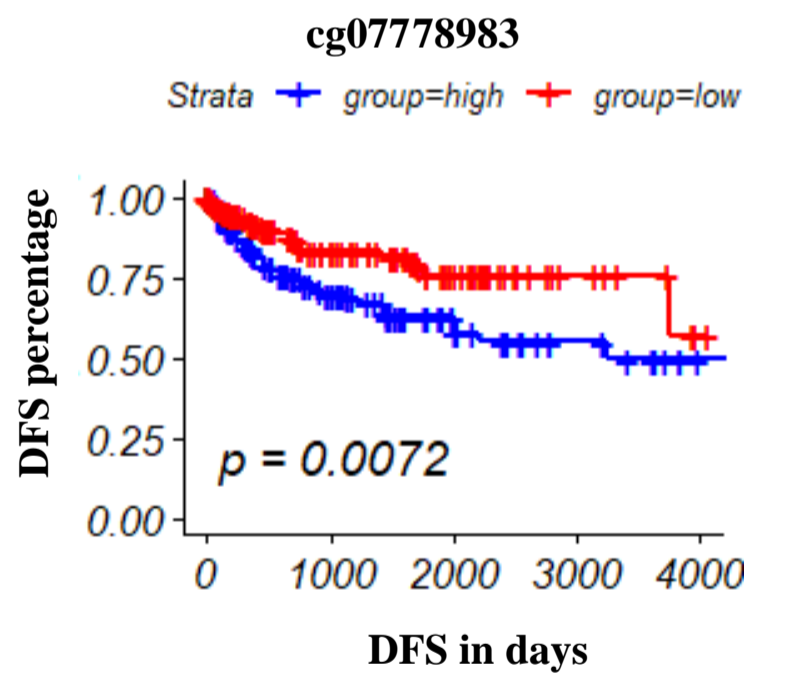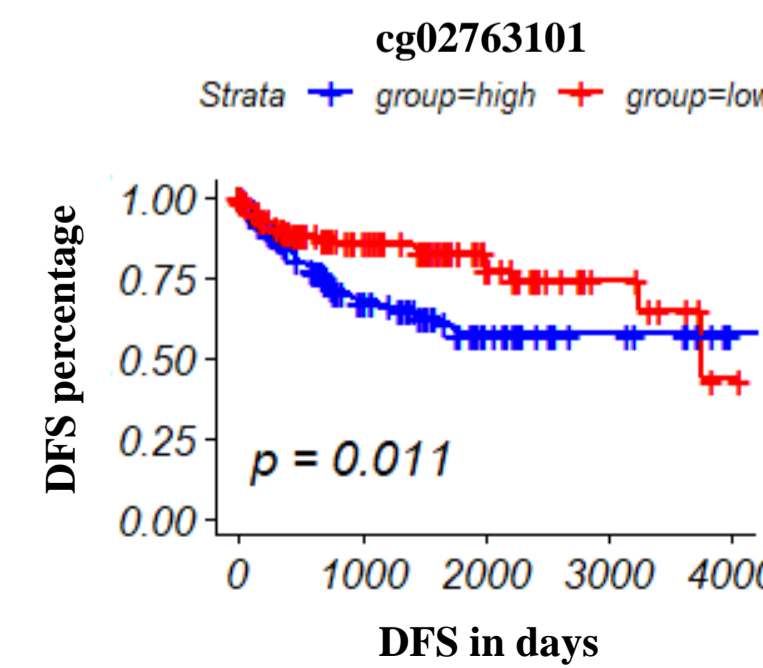

Supplement: MOESM4 [file 18951600]

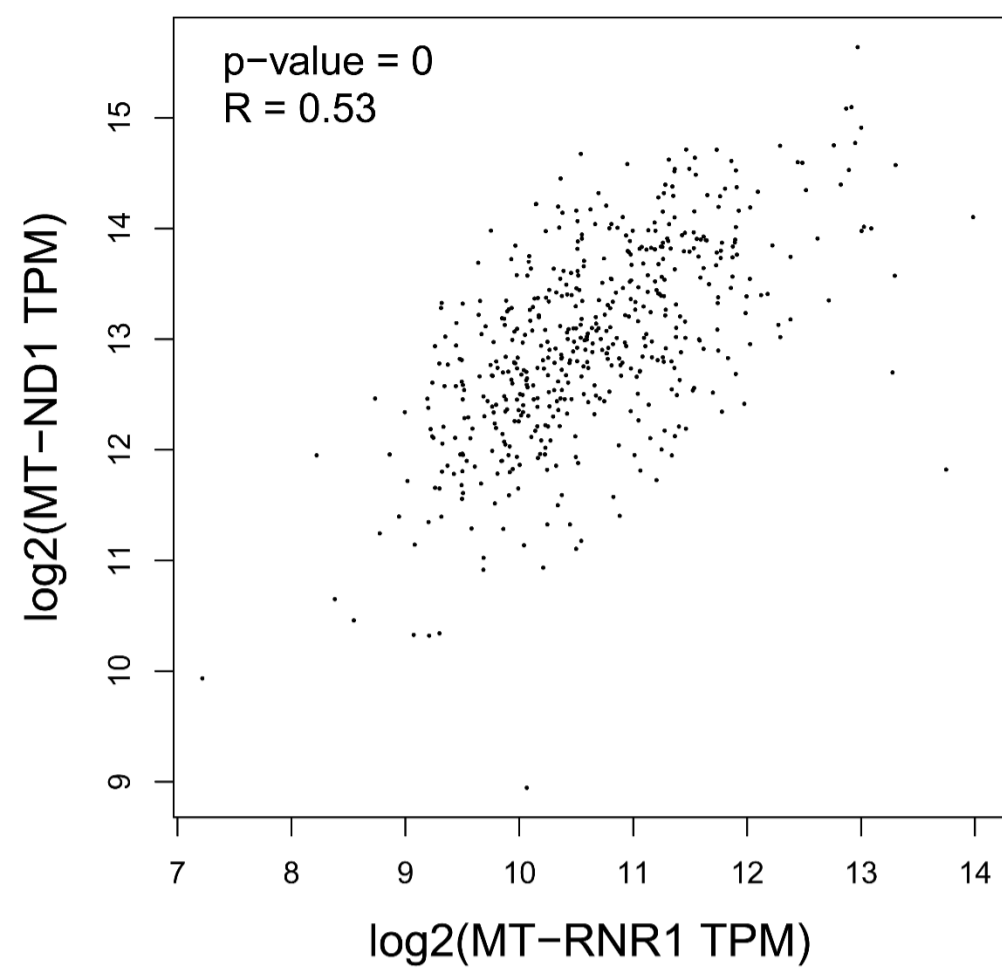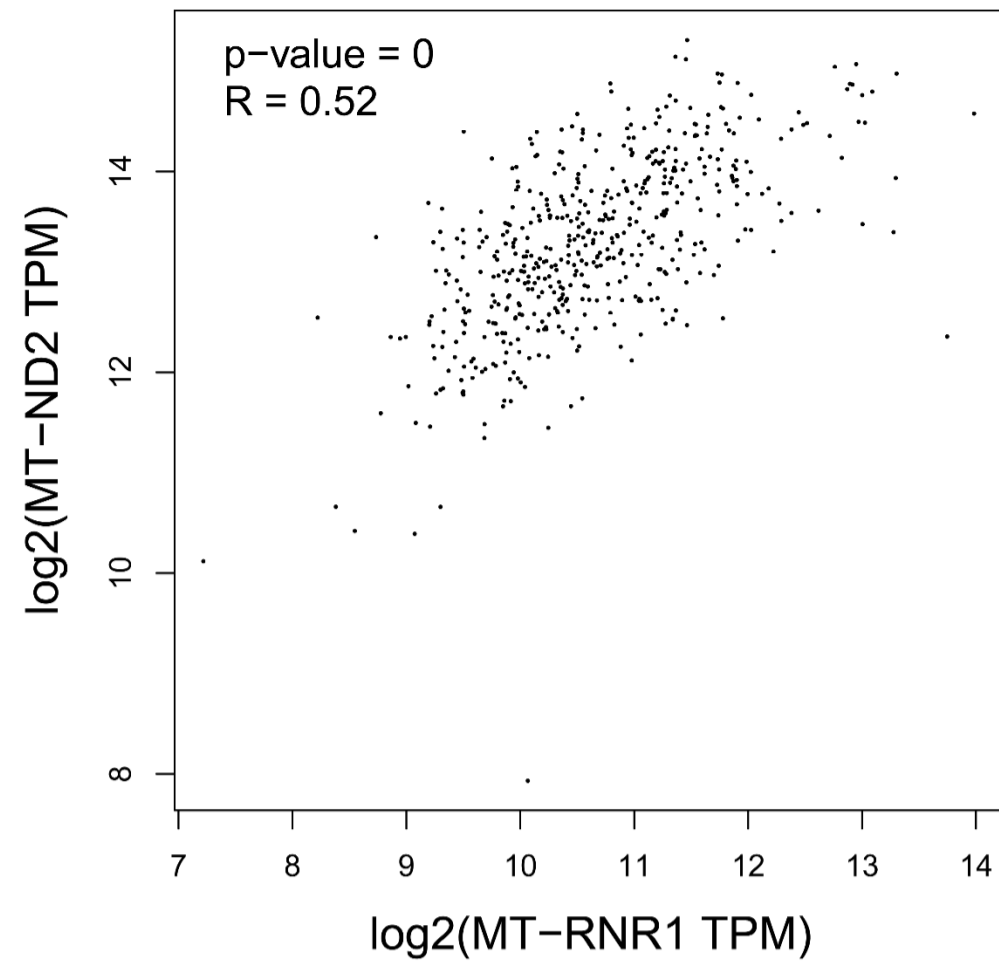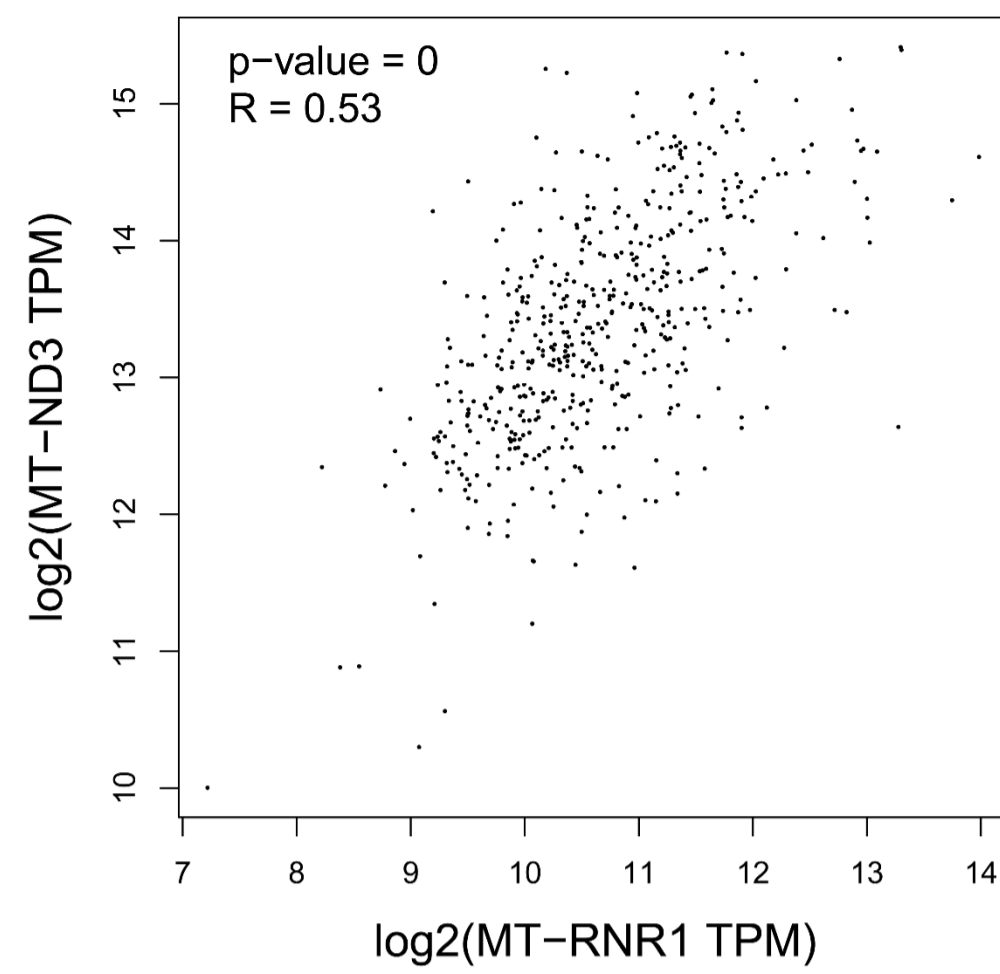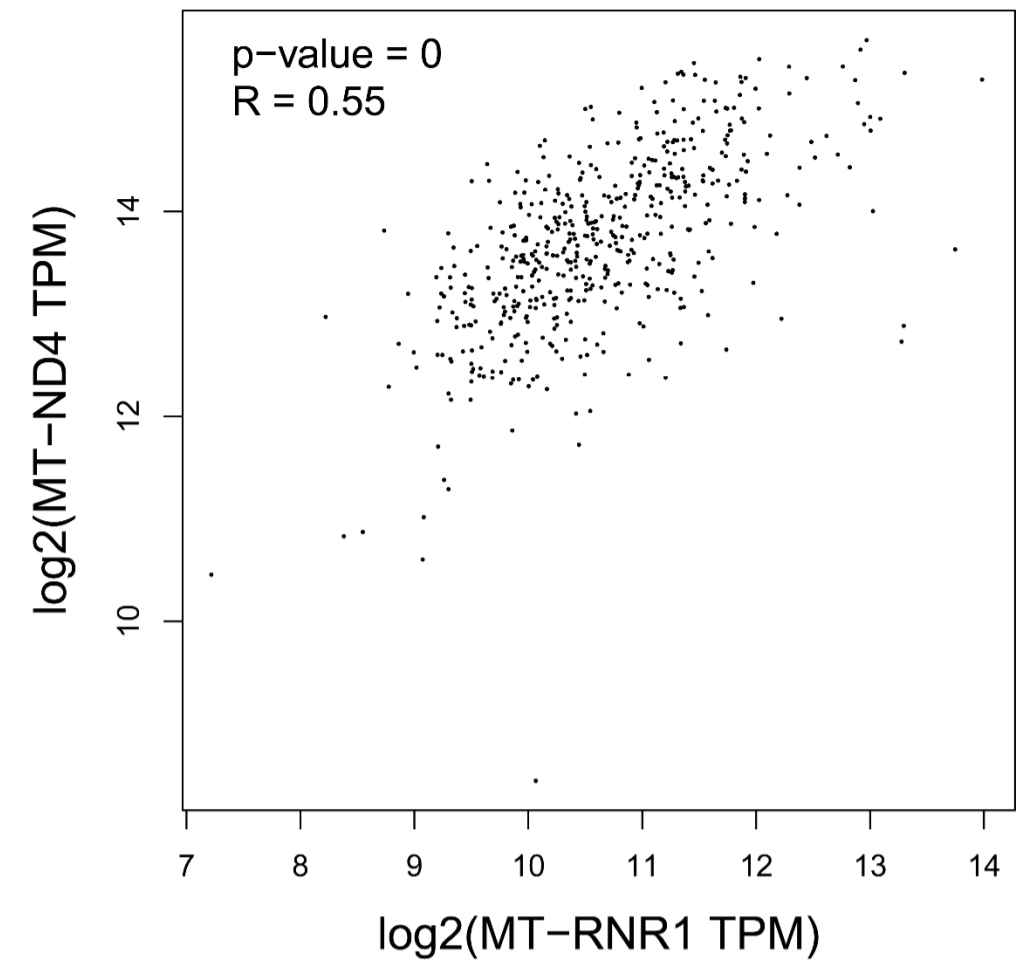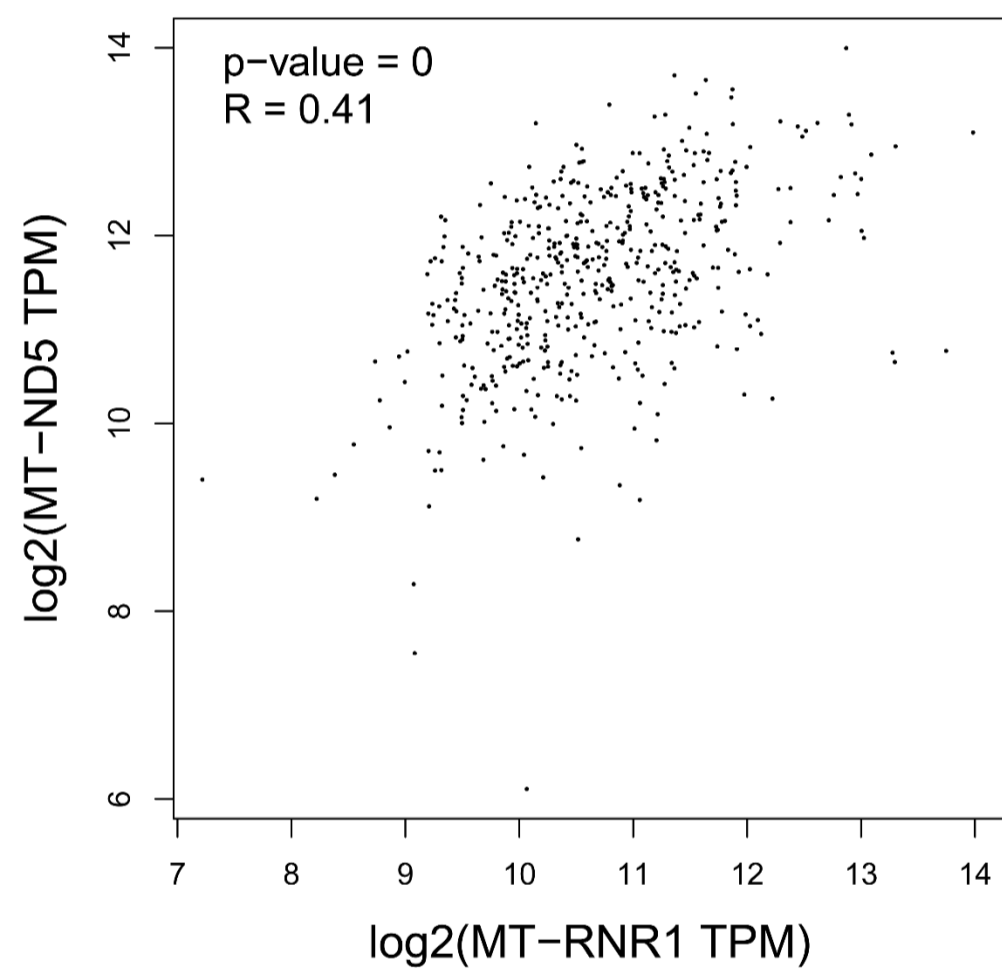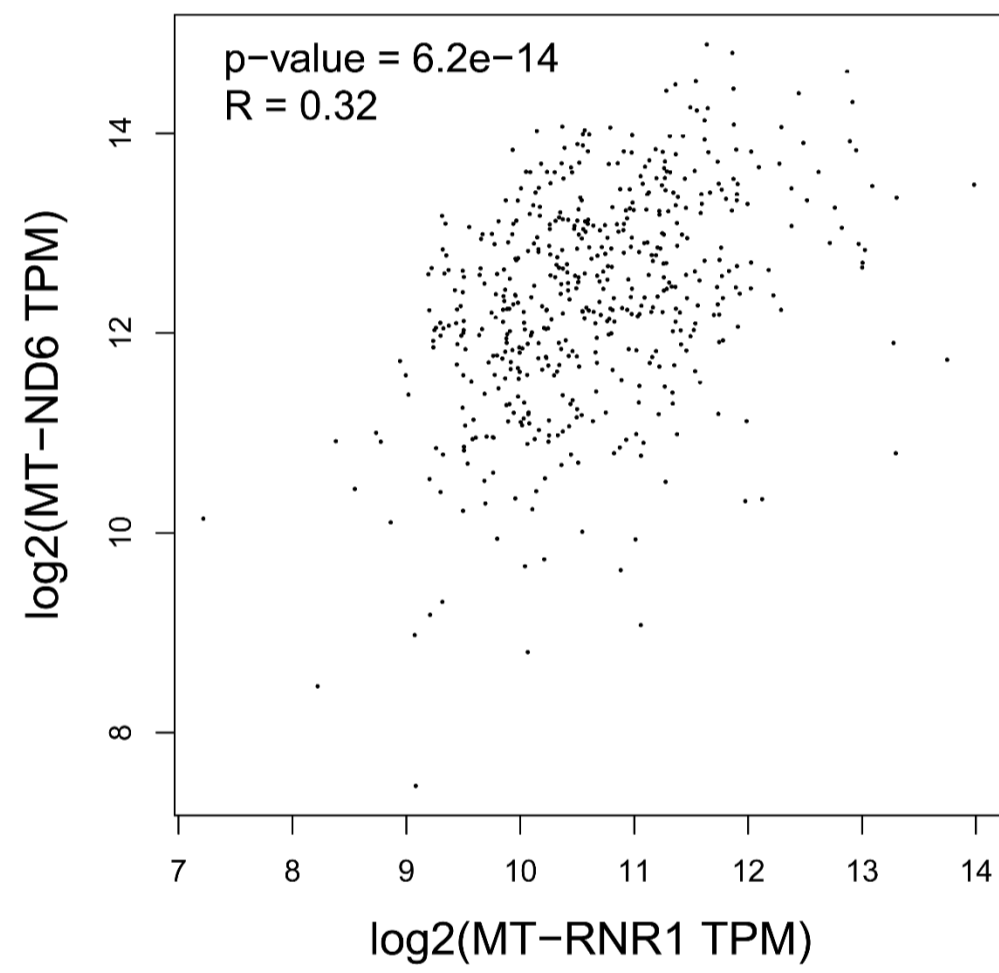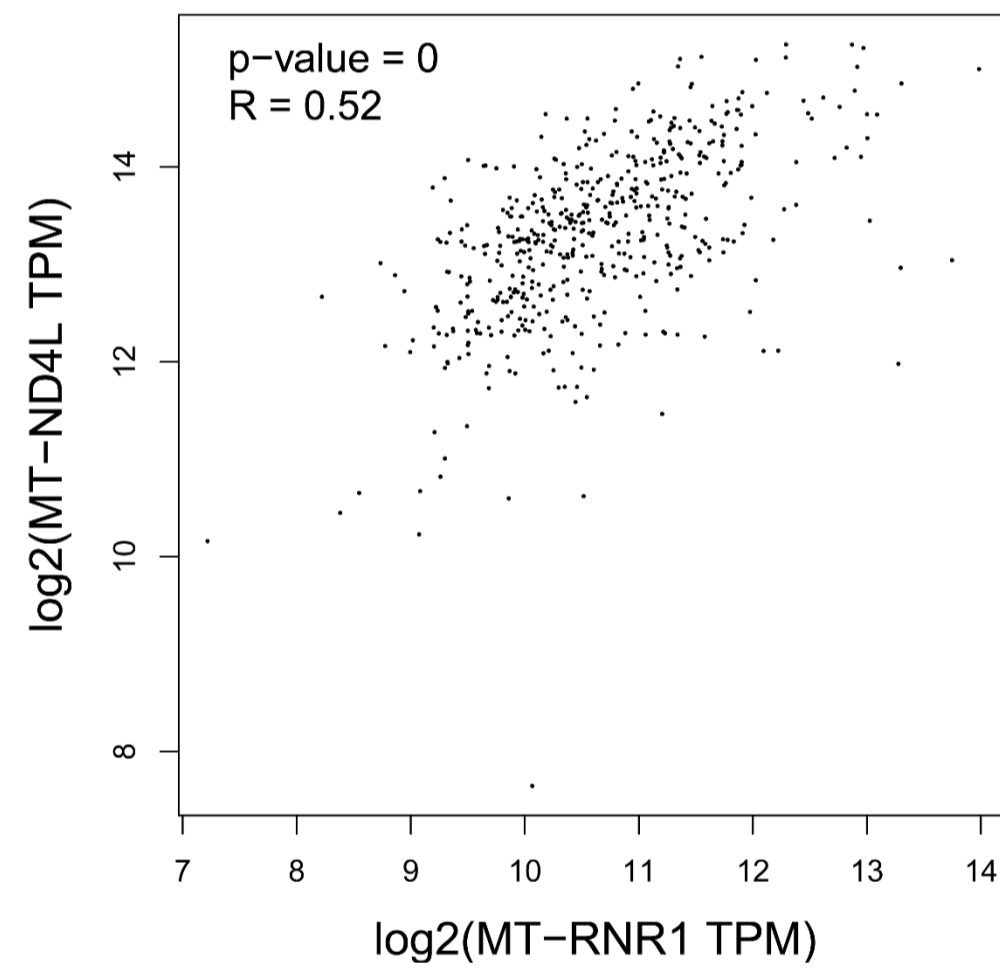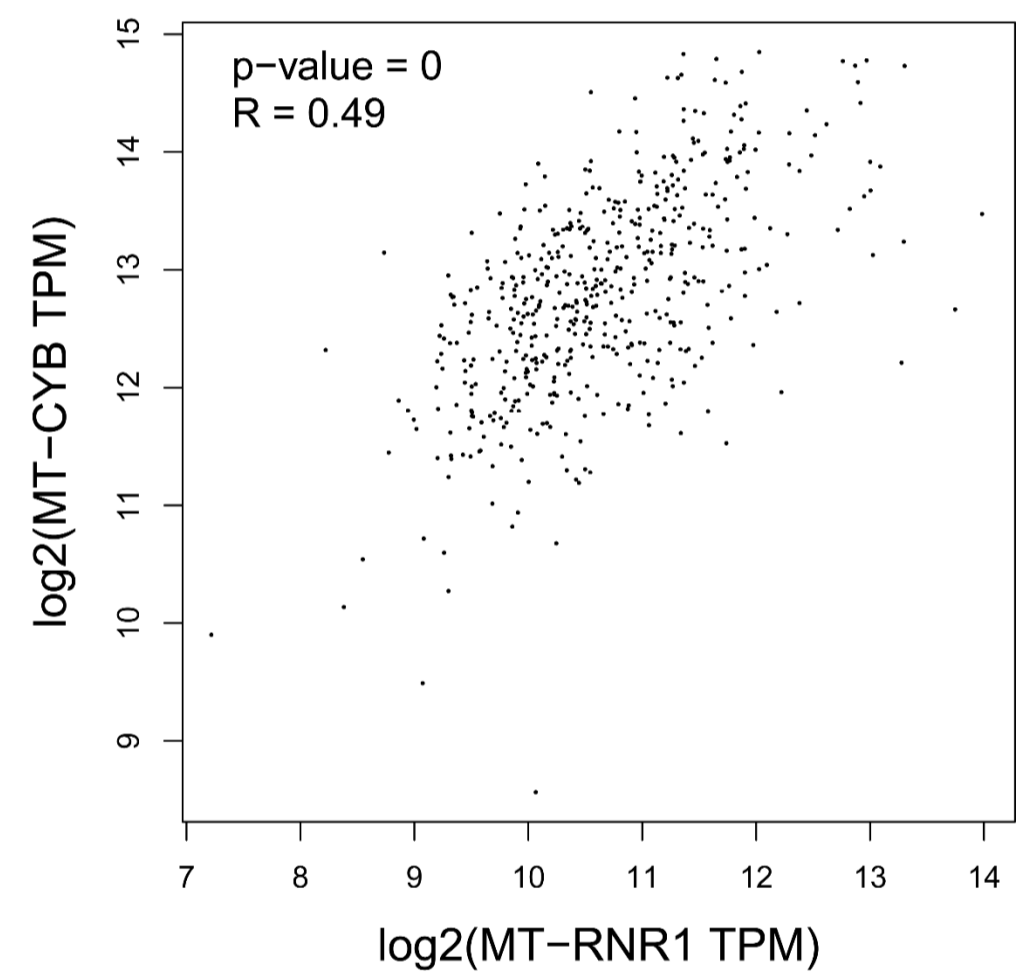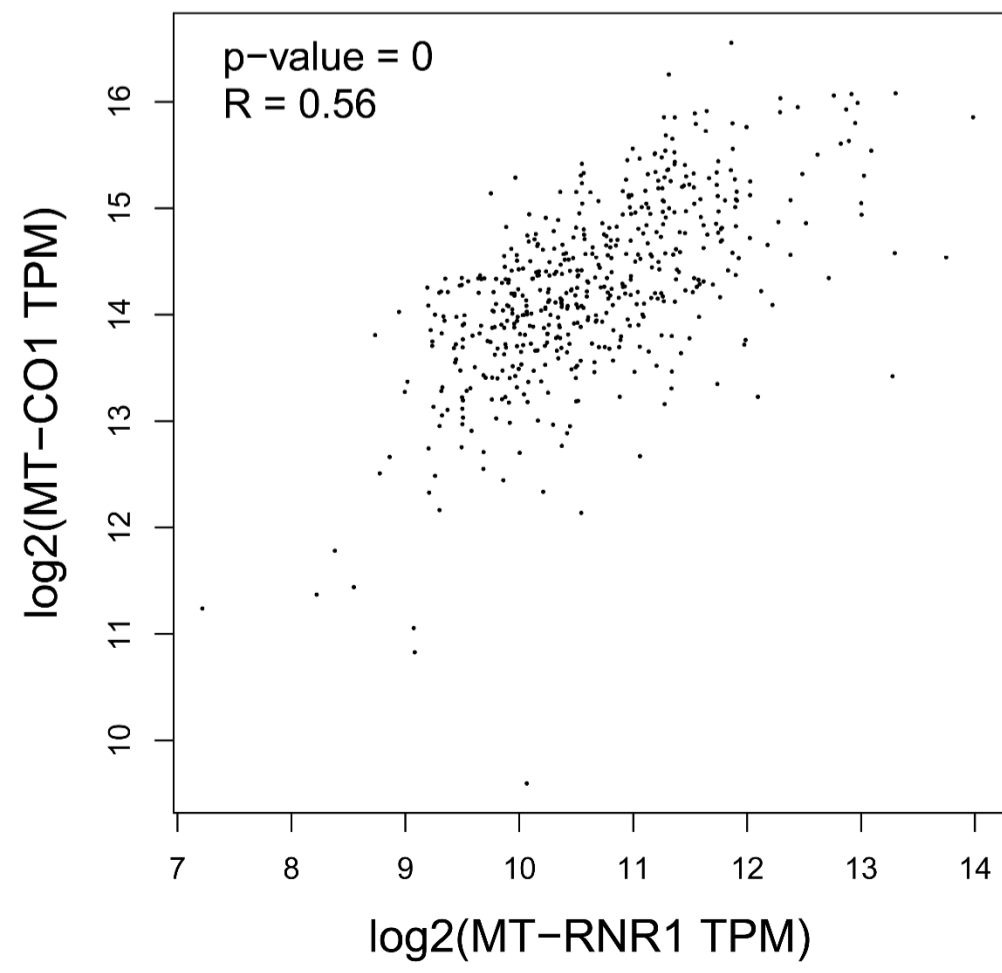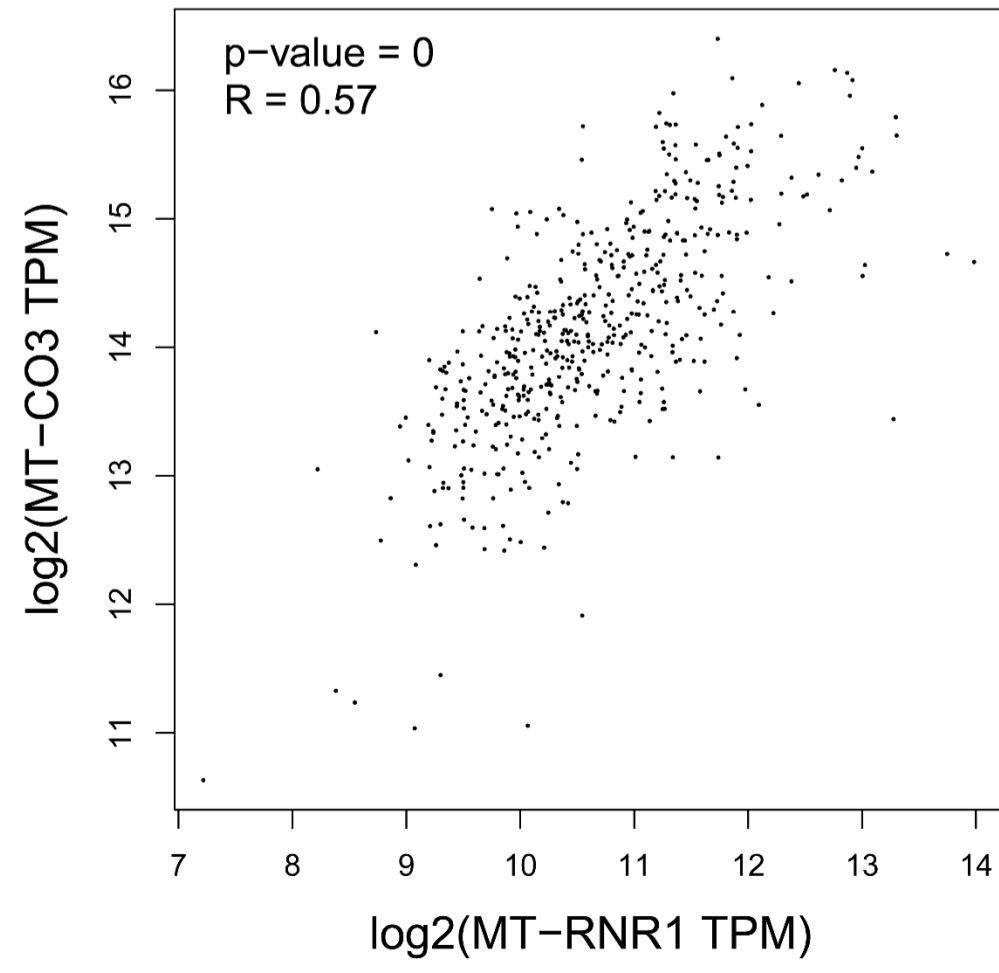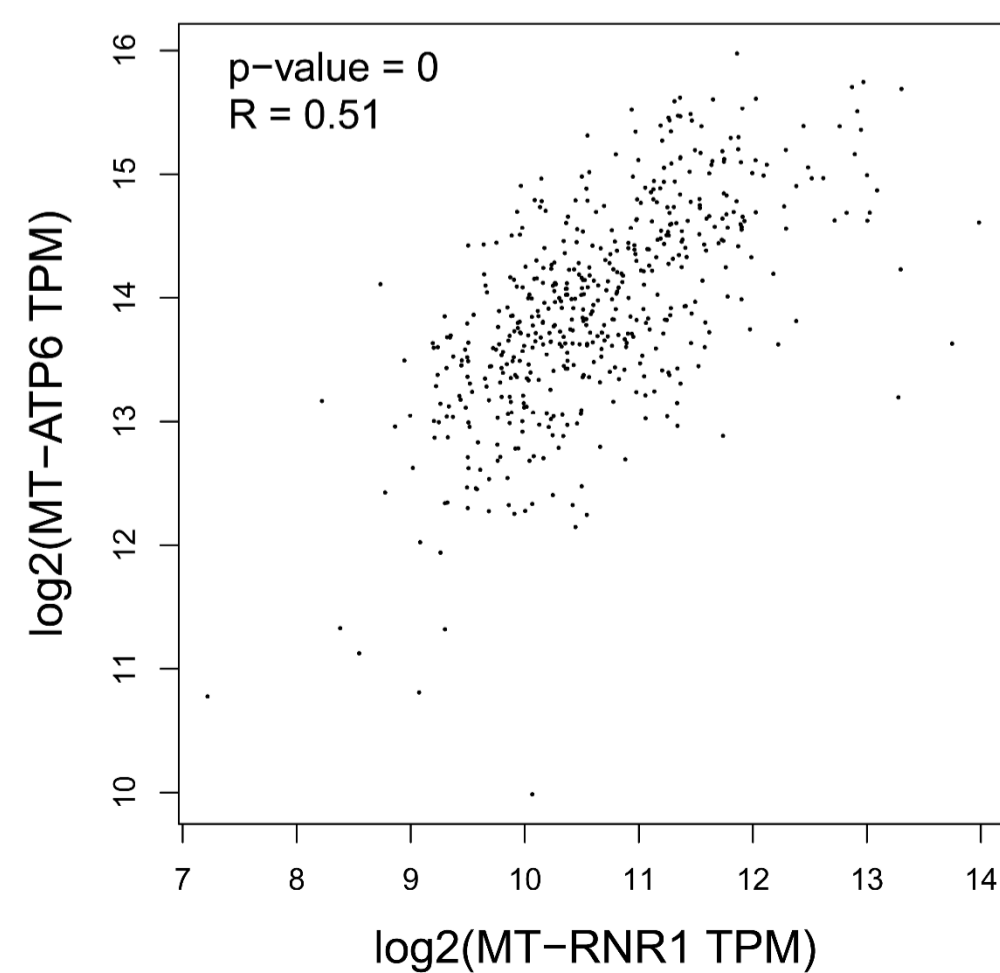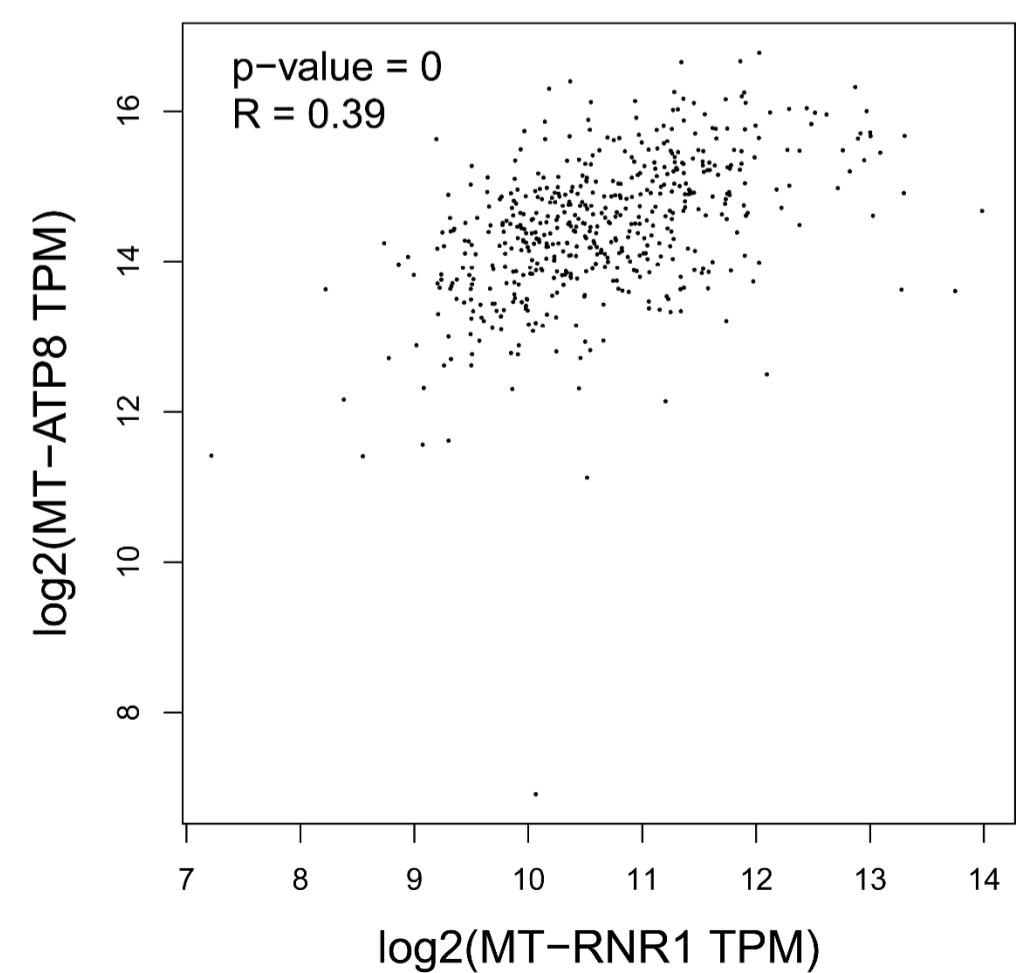

Supplement: MOESM7 [file 18951600]
